# Supplementary material for: Large-scale transcriptomics to dissect 2 years of the life of a fungal phytopathogen interacting with its host plant
Source: PubMed Central journal article supplement (PMC7986464; doi:10.1186/s12915-021-00989-3), 2021-03-23
Supplement: 12915_2021_989_MOESM2_ESM.pdf [file 12915_2021_989_MOESM2_ESM.pdf]

**S1 Table. Results of the mapping parameters tested for distinguishing between reads from *L. maculans* and *L. biglobosa*.**

<sup>a</sup>. Reads of the two samples from *in vitro* cultures of either *L. maculans* (isolate JN2) or *L. biglobosa* (isolate G12-14) were mapped independently on the genomes of *L. maculans* (isolate JN3) and *L. biglobosa* isolate G12-14)

<sup>b</sup>. Reads of the two samples from *in vitro* cultures of either *L. maculans* (isolate JN2) or *L. biglobosa* (isolate G12-14) were both mapped on one artificial genome created by the concatenation of the *L. maculans* (isolate JN3) and *L. biglobosa* (isolate G12-14) genomes.

| Reference mapping genome                           | RNAseq samples used                                     | Number of mismatch allowed | % of reads mapped on <i>L. maculans</i> (JN3) genome | % of reads mapped on <i>L. biglobosa</i> (G12-14) genome |
|----------------------------------------------------|---------------------------------------------------------|----------------------------|------------------------------------------------------|----------------------------------------------------------|
| <sup>a</sup> . JN3 or G12-14 genomes               | <i>In vitro</i> culture of <i>L. maculans</i> (JN2)     | 0                          | 96.62                                                | 0.46                                                     |
|                                                    |                                                         | 1                          | 97.27                                                | 0.97                                                     |
|                                                    |                                                         | 2                          | 97.42                                                | 1.63                                                     |
|                                                    | <i>In vitro</i> culture of <i>L. biglobosa</i> (G12-14) | 0                          | 0.76                                                 | 95.13                                                    |
|                                                    |                                                         | 1                          | 1.54                                                 | 95.59                                                    |
|                                                    |                                                         | 2                          | 2.66                                                 | 95.69                                                    |
| <sup>b</sup> . JN3 and G12-14 concatenated genomes | <i>In vitro</i> culture of <i>L. maculans</i> (JN2)     | 0                          | 96.7                                                 | 0.04                                                     |
|                                                    |                                                         | 1                          | 97.32                                                | 0.06                                                     |
|                                                    |                                                         | 2                          | 97.45                                                | 0.08                                                     |
|                                                    | <i>In vitro</i> culture of <i>L. biglobosa</i> (G12-14) | 0                          | 0.10                                                 | 95.15                                                    |
|                                                    |                                                         | 1                          | 0.11                                                 | 95.58                                                    |
|                                                    |                                                         | 2                          | 0.12                                                 | 95.67                                                    |
