# Supplementary material for: Large-scale transcriptomics to dissect 2 years of the life of a fungal phytopathogen interacting with its host plant
Source: PubMed Central journal article supplement (PMC7986464; doi:10.1186/s12915-021-00989-3), 2021-03-23
Supplement: 12915_2021_989_MOESM22_ESM.pdf [file 12915_2021_989_MOESM22_ESM.pdf]

**S7 Table. Genes with more than 10 reads in (A) at least one of the four replicates of samples at 24 h or 48 h after ascospore ejection on cotyledons (B) at least one of the nine replicates from the three samples of stem base tissues at 2, 3 or 5 months post sowing.**

<sup>a</sup> Total number of genes with a count > 10 reads in at least one of the replicates at 24h or 48h post infection by ascospores

<sup>b</sup> No of genes absent from the set of 1,207 genes over-expressed in one of the 22 analyzable conditions compared to the ten *in vitro* conditions

<sup>c</sup> No of genes present in the set of 1,207 genes over-expressed in one of the 22 analyzable conditions compared to the ten *in vitro* conditions, and their cluster assignment (cluster 1 to cluster 8).

**A**

| Gene categories                                                                                     | Non-SSP | SSP                                 |
|-----------------------------------------------------------------------------------------------------|---------|-------------------------------------|
| Total number of genes with a count > 10 reads <sup>a</sup>                                          | 55      | 31                                  |
| No of genes showing no differential expression <sup>b</sup>                                         | 33      | 2                                   |
| No of genes over-expressed during the infectious cycle and their cluster assignments <sup>c</sup> : | 22      | 29                                  |
| cluster 1                                                                                           | 0       | 1                                   |
| cluster 2                                                                                           | 6       | 26 (including 7 <i>AvrLm</i> genes) |
| cluster 3                                                                                           | 0       | 1                                   |
| cluster 4                                                                                           | 2       | 0                                   |
| cluster 5                                                                                           | 0       | 0                                   |
| cluster 6                                                                                           | 0       | 1                                   |
| cluster 7                                                                                           | 5       | 0                                   |
| cluster 8                                                                                           | 9       | 0                                   |

**B**

---

| <b>Gene categories</b>                                                                              | <b>Non-SSP</b> | <b>SSP</b>                          |
|-----------------------------------------------------------------------------------------------------|----------------|-------------------------------------|
| Total number of genes with a count > 10 reads <sup>a</sup> 331                                      |                | 62                                  |
| No of genes showing no differential expression <sup>b</sup> 278                                     |                | 11                                  |
| No of genes over-expressed during the infectious cycle and their cluster assignments <sup>c</sup> : | 53             | 51                                  |
| cluster 1                                                                                           | 6              | 2                                   |
| cluster 2                                                                                           | 27             | 40 (including 6 <i>AvrLm</i> genes) |
| cluster 3                                                                                           | 2              | 2                                   |
| cluster 4                                                                                           | 8              | 3                                   |
| cluster 5                                                                                           | 9              | 4 (including one late effector)     |
| cluster 6                                                                                           | 0              | 0                                   |
| cluster 7                                                                                           | 1              | 0                                   |
| cluster 8                                                                                           | 0              | 0                                   |

---
