# Supplementary material for: Large-scale transcriptomics to dissect 2 years of the life of a fungal phytopathogen interacting with its host plant
Source: PubMed Central journal article supplement (PMC7986464; doi:10.1186/s12915-021-00989-3), 2021-03-23
Supplement: 12915_2021_989_MOESM23_ESM.pdf [file 12915_2021_989_MOESM23_ESM.pdf]

**S8 Table. Conservation of the protein sequences encoded by highly co-expressed SSP genes.**

<sup>a</sup>. Number of SSP genes detected as highly correlated with each reference expression wave

<sup>b</sup>. Number of *AvrLm* effectors and *LmSTEE* effectors detected as highly correlated with each reference expression wave

<sup>c</sup>. Number of SSP sequences with no homology after a BLAST search

| Assignment to wave | <sup>a</sup> . Total no of highly co-regulated SSP genes | <sup>b</sup> . No of known effectors in <i>L. maculans</i> | <sup>c</sup> . No of SSP without homologous protein in the non-redundant protein NCBI database |
|--------------------|----------------------------------------------------------|------------------------------------------------------------|------------------------------------------------------------------------------------------------|
| Wave 1             | 1                                                        | -                                                          | -                                                                                              |
| Wave 2             | 39                                                       | 7                                                          | 23                                                                                             |
| Wave 3             | 0                                                        | -                                                          | -                                                                                              |
| Wave 4             | 20                                                       | 3                                                          | 12                                                                                             |
| Wave 5             | 7                                                        | 2                                                          | 2                                                                                              |
| Wave 6             | 5                                                        | 0                                                          | 1                                                                                              |
| Wave 7             | 23                                                       | 0                                                          | 2                                                                                              |
| Wave 8             | 1                                                        | -                                                          | -                                                                                              |
